# Supplementary material
Source: Springer Nature journal article supplement (https://www.springermedizin.de/resource/supplementary/12906_2012_1202_MOESM2_ESM.pdf/9520170)

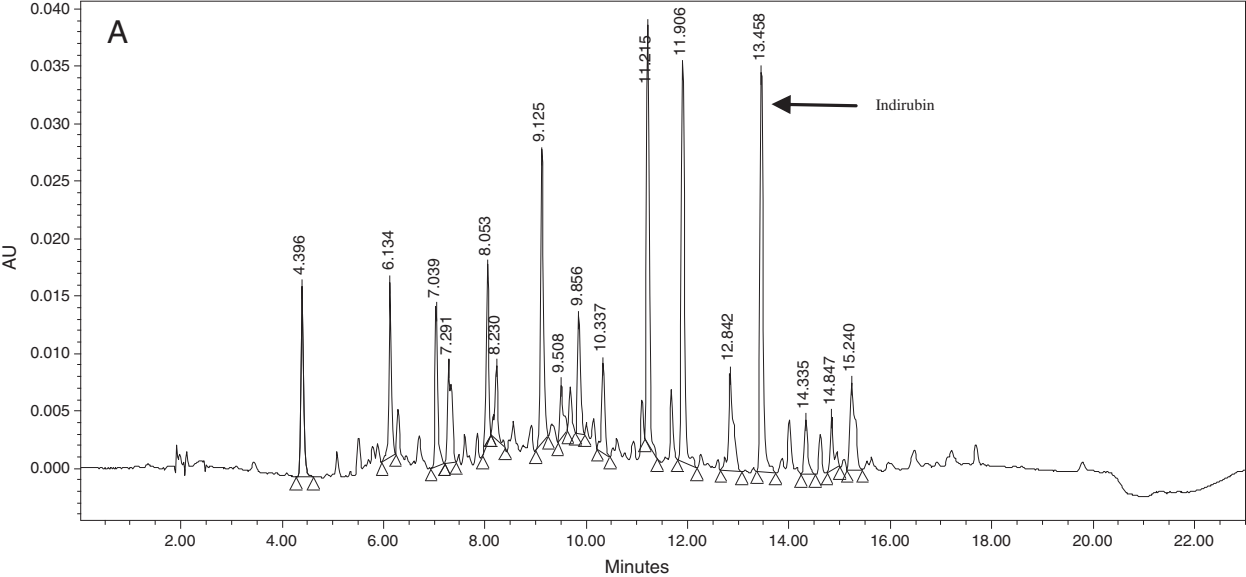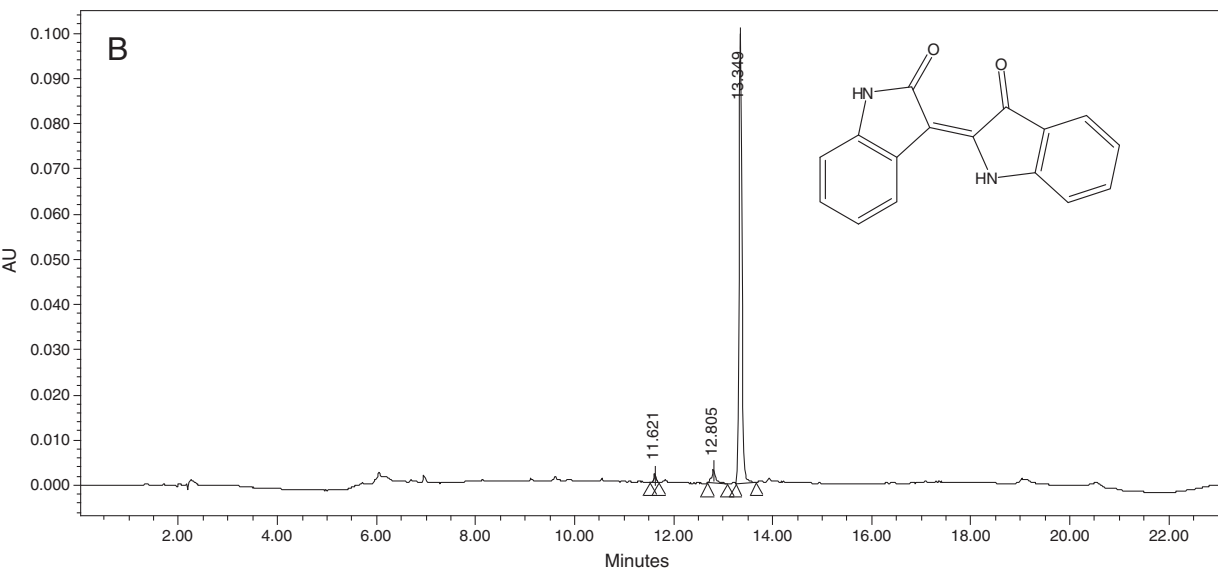

Supplement: MOESM2 [file 9520170]
